# Supplementary material
Source: PubMed Central journal article supplement (PMC4233175)

Supplementary figures 1-6

Figure S1. Chemical structures of imatinib, sunitinib, regorafenib and ponatinib

Ponatinib

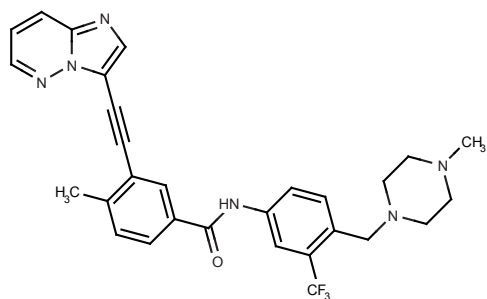

Imatinib

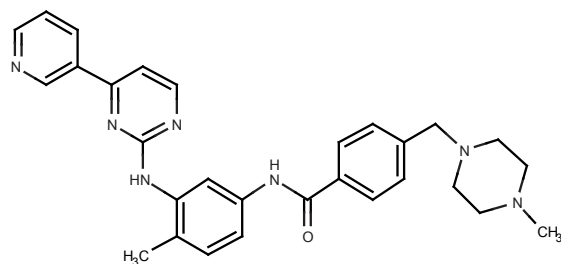

Sunitinib

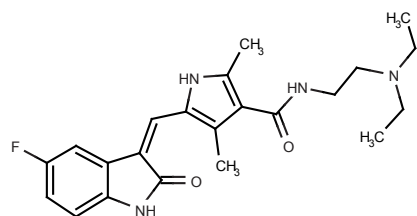

Regorafenib

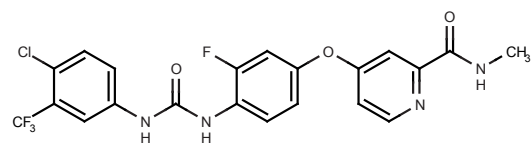

Figure S2. Expression and activation of KIT in engineered Ba/F3 cells

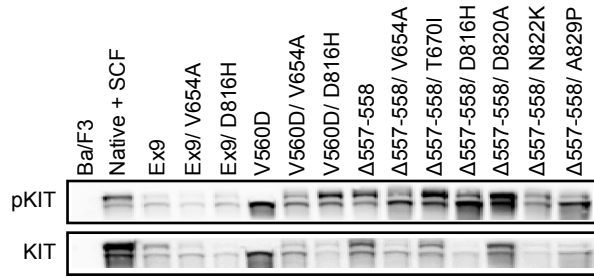

Figure S3. Ponatinib inhibits the phosphorylation of exon 11 primary activating, and secondary resistant mutant forms of KIT

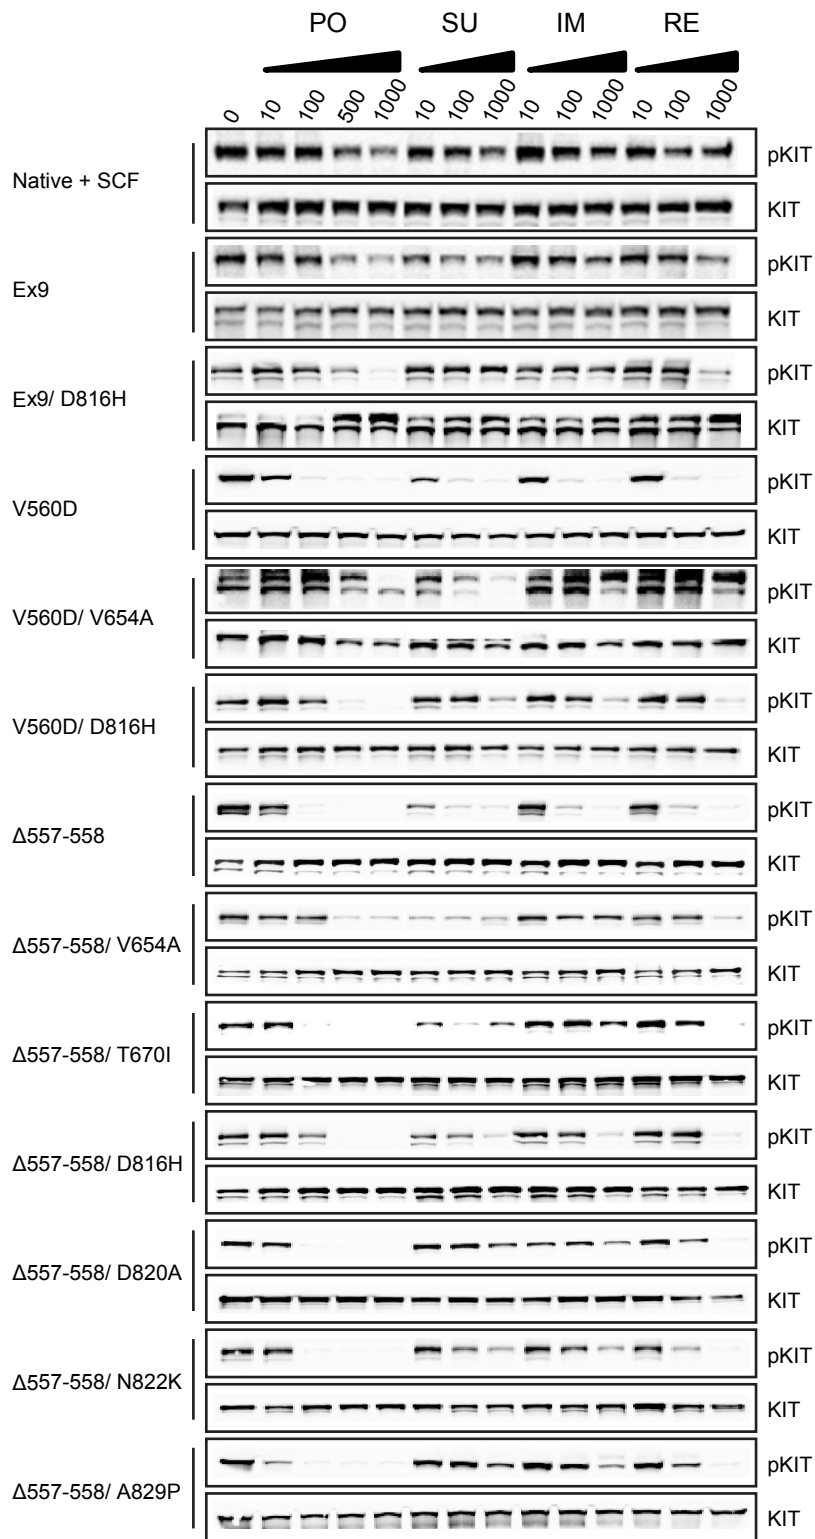

Figure S4. Secondary mutants reduce ponatinib potency in Ex9 ins and V560D cell lines

A

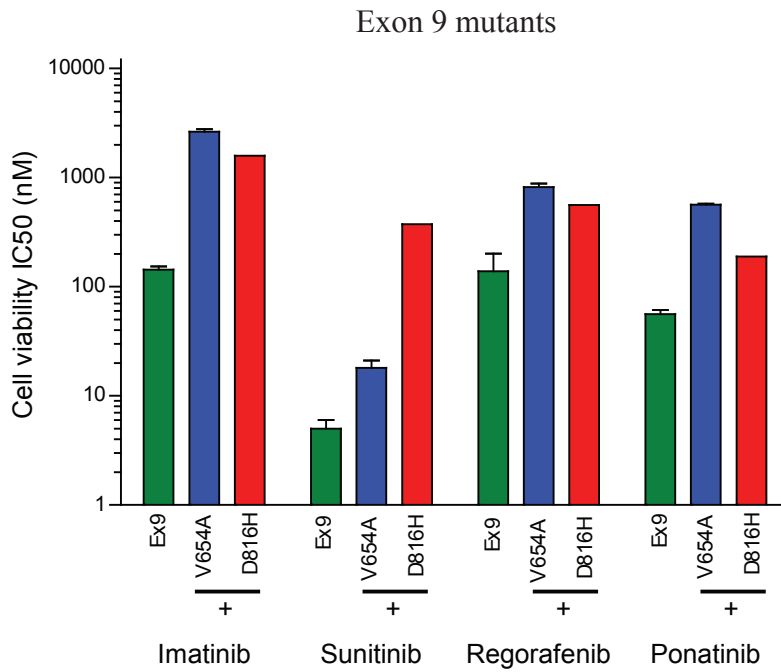

B

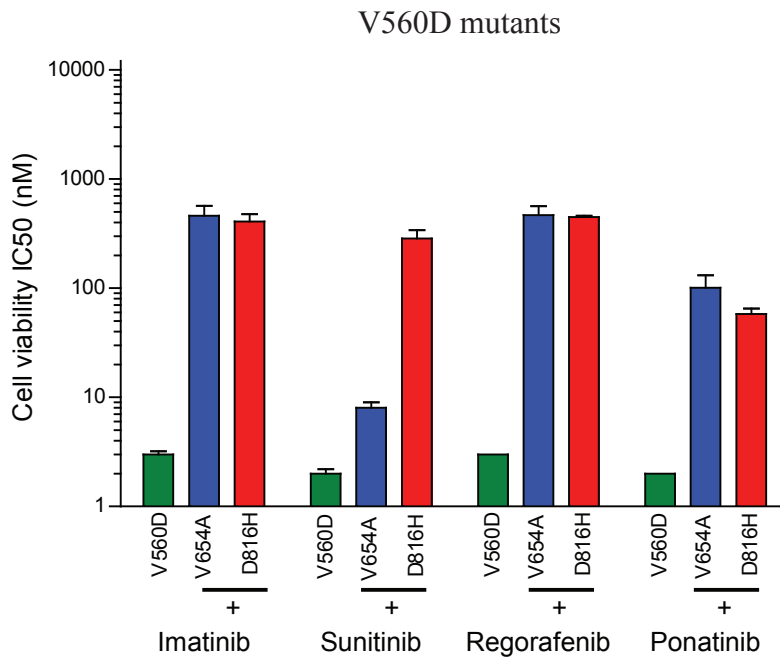



Figure S5. Illustration of the optimal fit of ponatinib to KIT

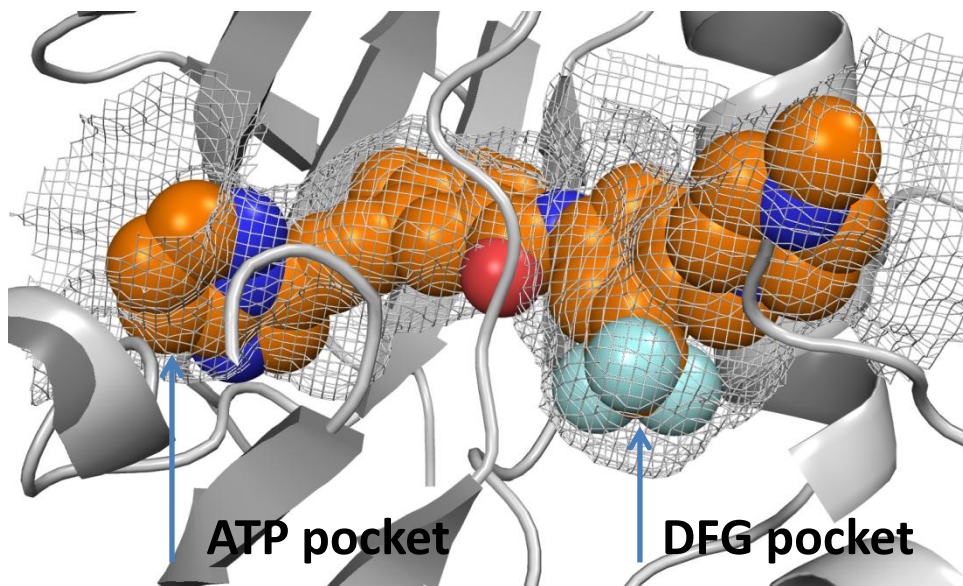

Figure S6. Impact of compound treatment on KIT signaling in GIST-derived cell lines

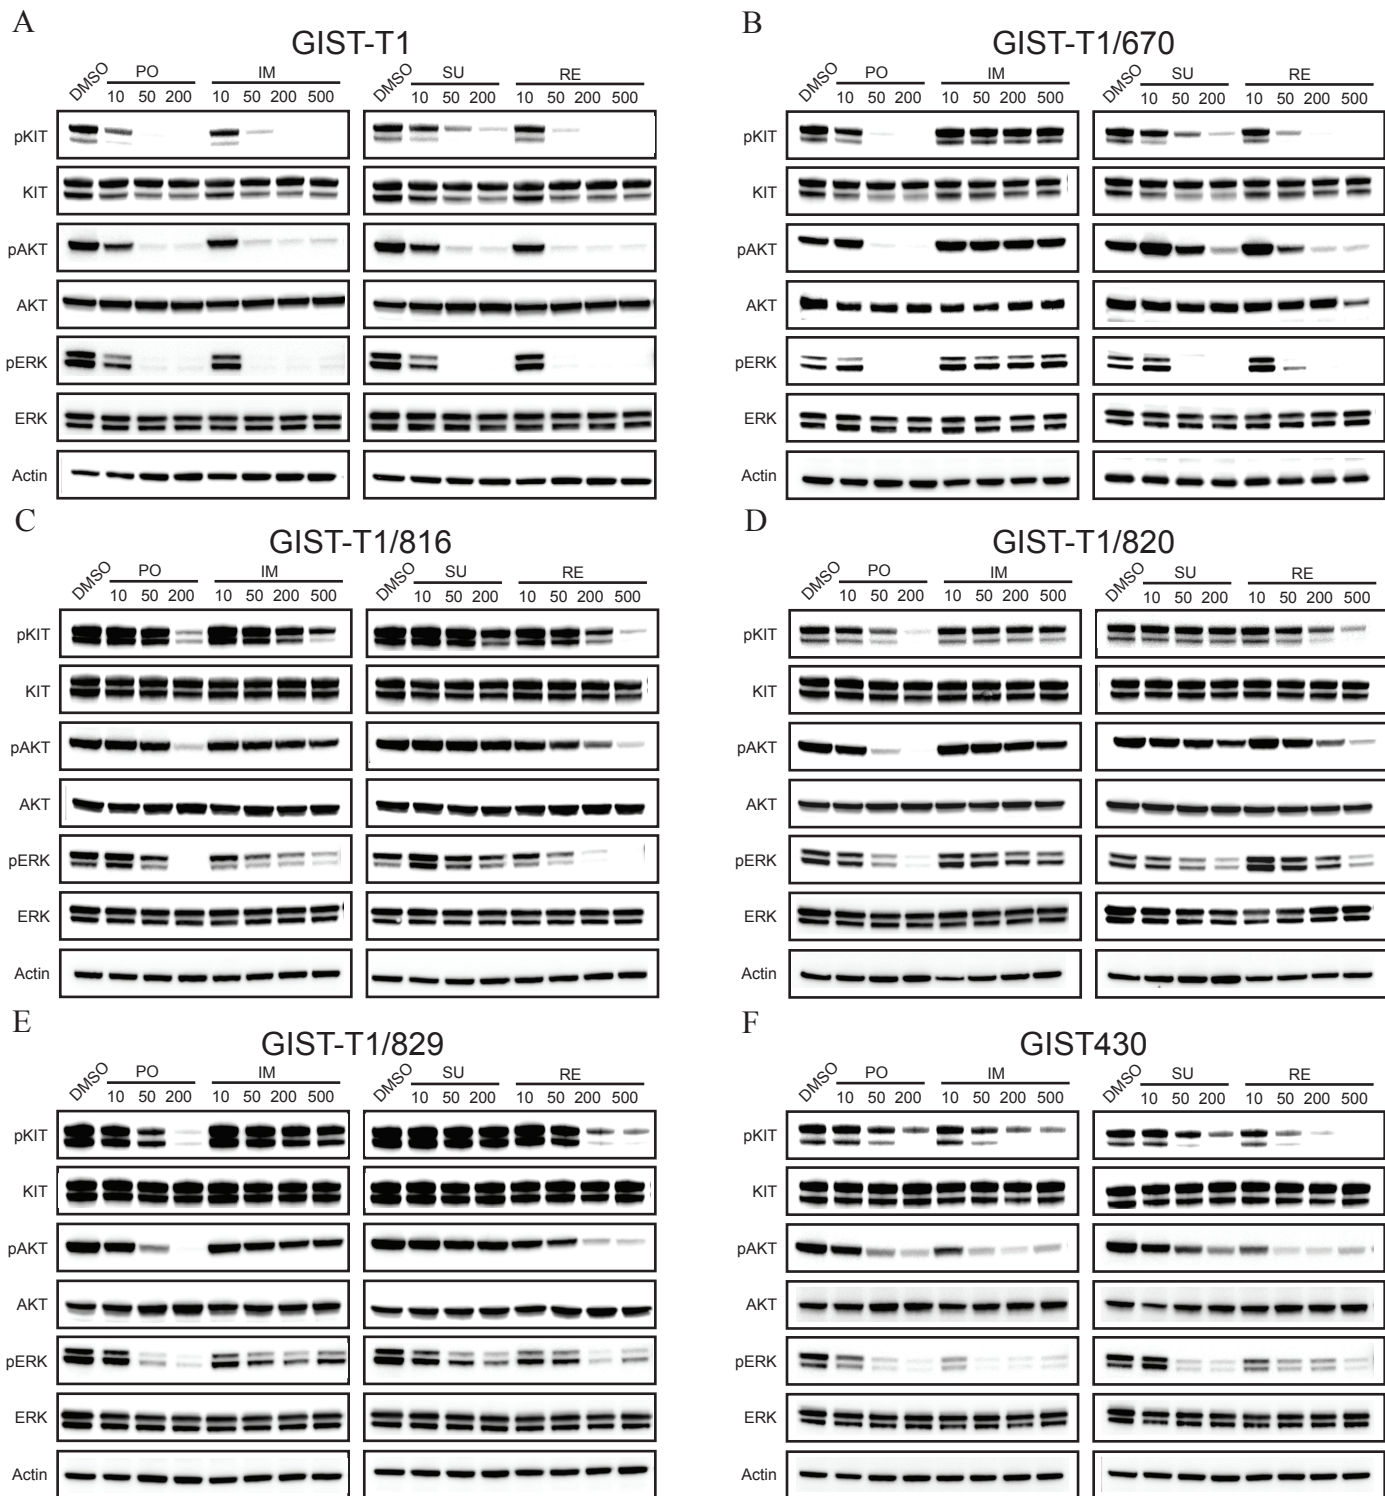

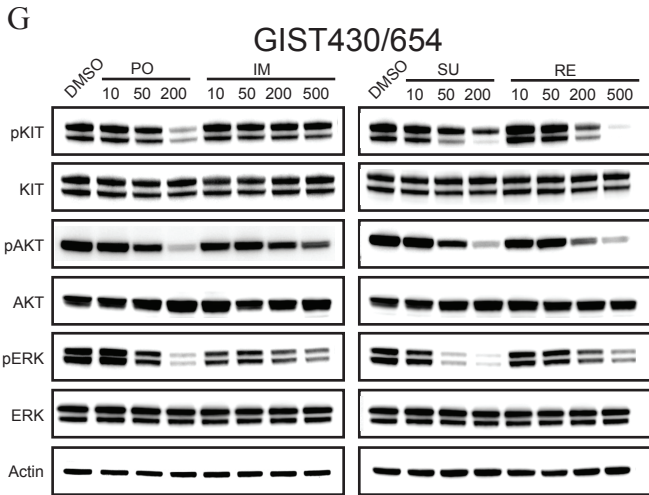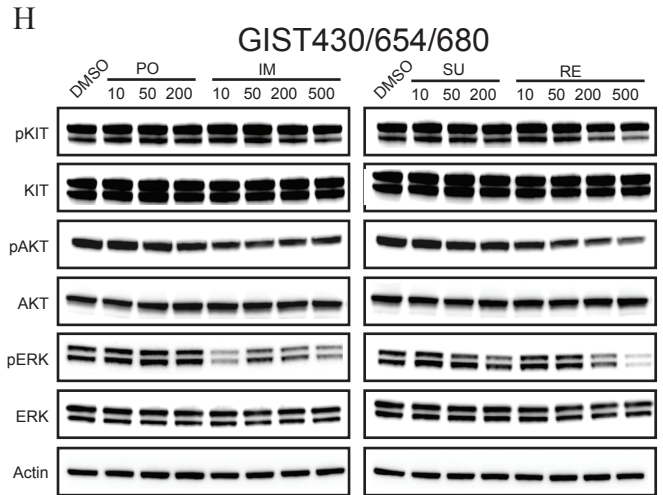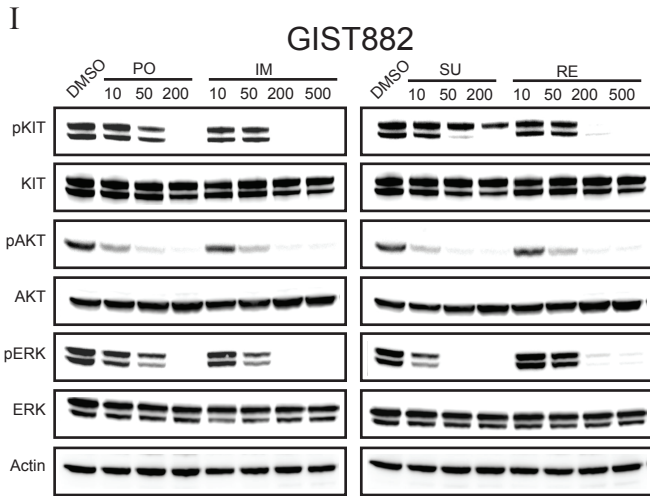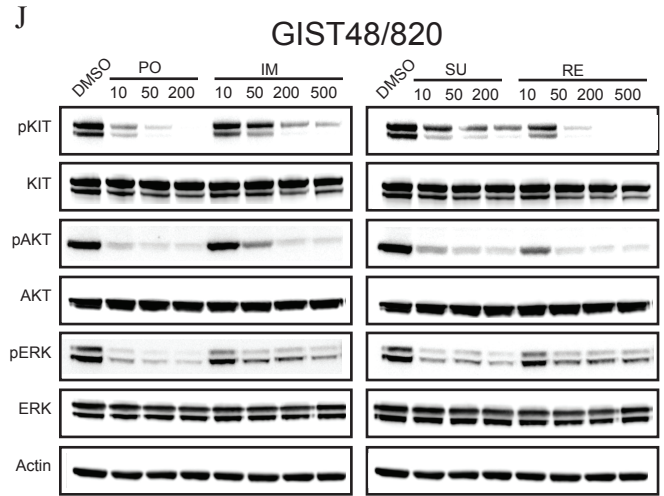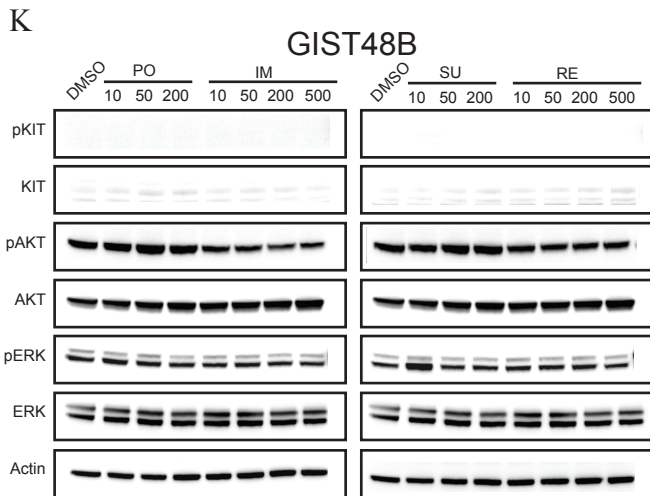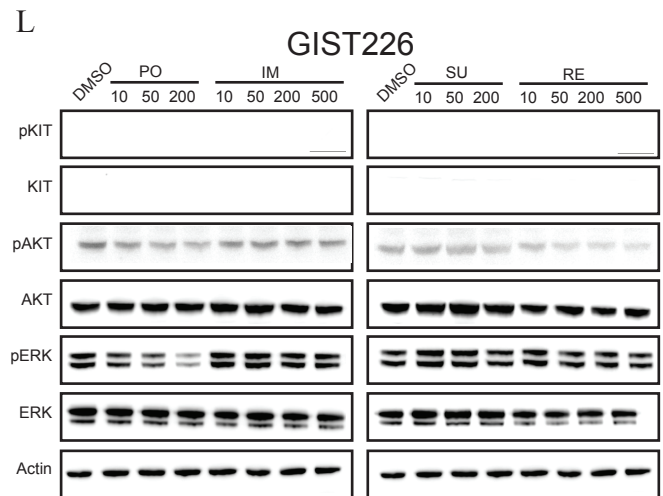

Supplement: NIHMS630778-supplement-3.pdf [file NIHMS630778-supplement-3.pdf]
